# Supplementary material for: Binder-free nickel–iron selenide catalyst arrays for coupling hydrogen production with polyethylene terephthalate plastic electro-upcycling
Source: Royal Society of Chemistry journal article supplement (doi:10.1039/d5ta06515a), 2025-11-19
Supplement: d5ta06515a1.pdf [file d5ta06515a1.pdf]

# **Binder-free Nickel Iron Selenide Catalyst arrays for coupling hydrogen production with polyethylene terephthalate plastic electro-upcycling**

Pooja J. Sharma<sup>1</sup>, Sanjay A. Bhakhar<sup>1</sup>, Meghana N. Patel<sup>2</sup>, Manish N. Nandpal<sup>2</sup>, Kaushik A. Bhakhar<sup>3</sup>, Samir G. Patel<sup>2</sup>, Parikshit Sahatiya<sup>4</sup>, Goli Nagaraju<sup>5</sup>, C.K. Sumesh<sup>1</sup>, Pratik M. Pataniya<sup>1,\*</sup>

*<sup>1</sup>Department of Physical Sciences, P D Patel Institute of Applied Sciences, Charotar University of Science and Technology, CHARUSAT, Changa, Gujarat, India.*

*<sup>2</sup>Department of Pharmaceutical Chemistry and Analysis, Ramanbhai Patel College of Pharmacy, Charotar University of Science and Technology, CHARUSAT Changa, Gujarat, India.*

*<sup>3</sup>Gandhinagar Institute of Pharmacy, Gandhinagar University, Gandhinagar, Gujarat-382721.*

*<sup>4</sup>Department of Electrical and Electronic Engineering, BITS Pilani Hyderabad, Secunderabad-500078, India.*

*<sup>5</sup>Department of Materials, Imperial College London, London, SW72AZ, United Kingdom.*

**Email:** \*pm.pataniya9991@gmail.com

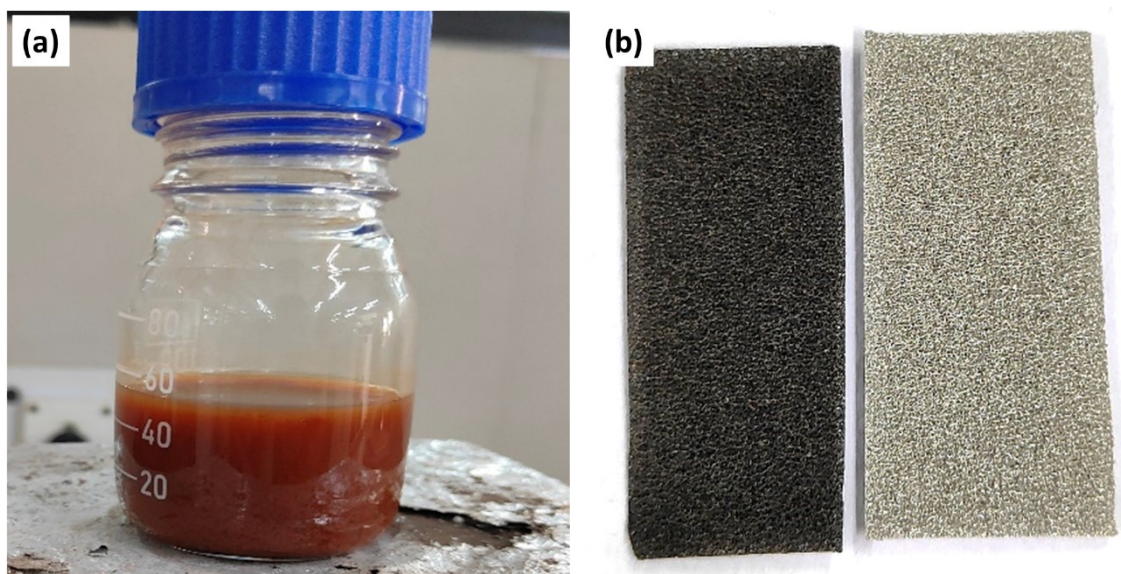

**Figure S1** Ni-Fe<sub>3</sub>Se<sub>4</sub> precursor solution for chemical bath deposition, (b) Digital image of Ni-Fe<sub>3</sub>Se<sub>4</sub> (left) and bare NF (right).

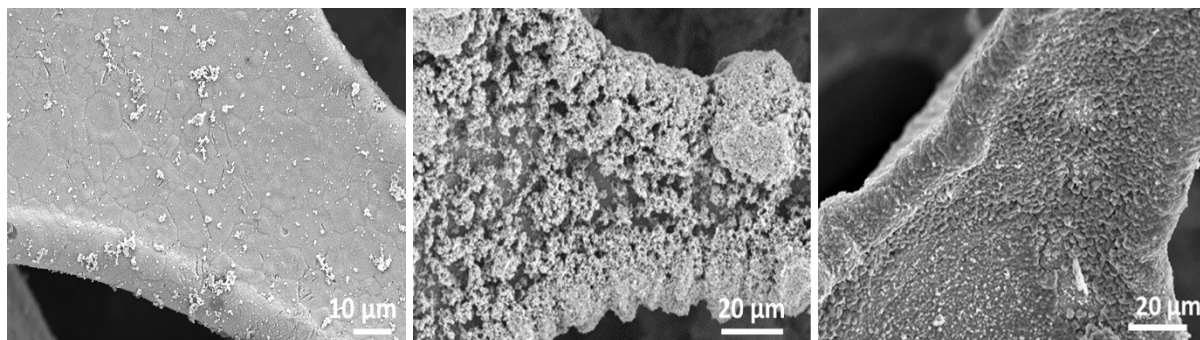

**Figure S2** SEM images of NiSe, Ni-Fe<sub>3</sub>O<sub>4</sub>, Ni-Fe<sub>3</sub>Se<sub>4</sub> electrodes, respectively.

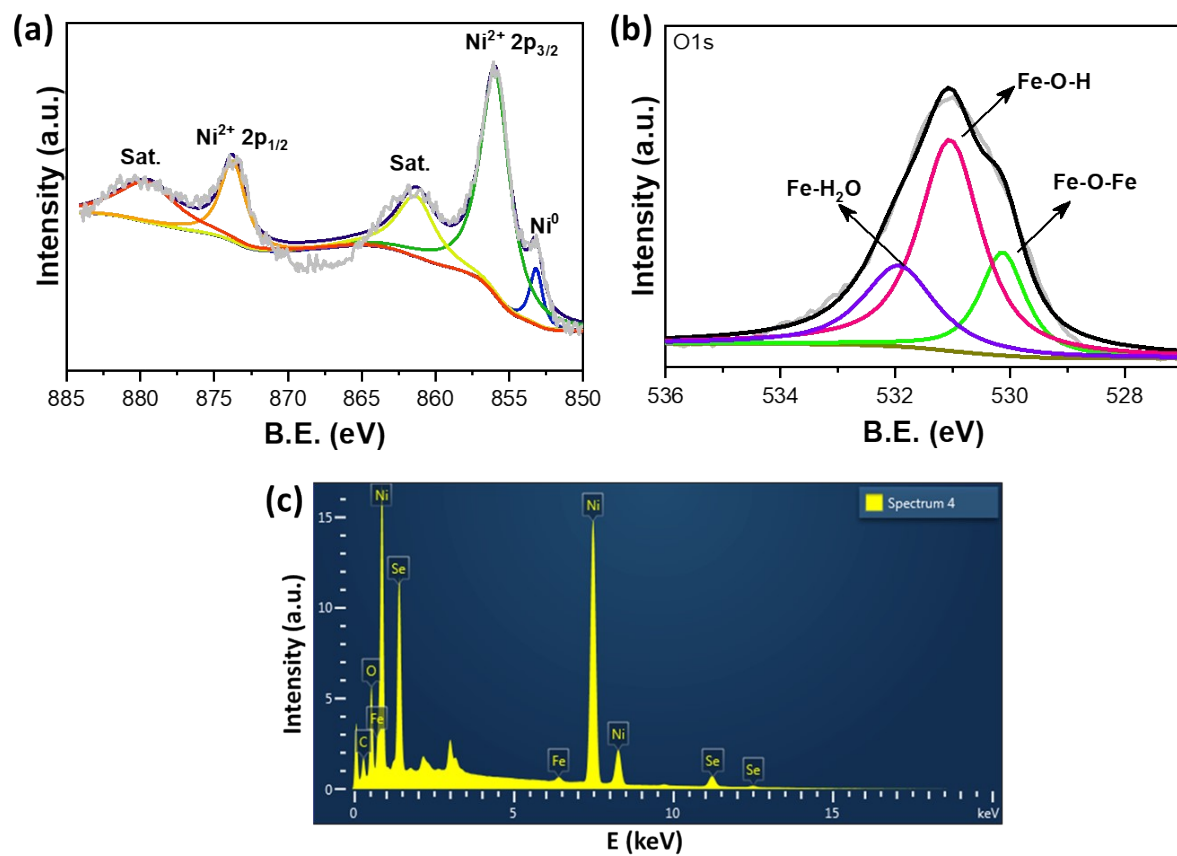

**Figure S3** (a) Ni2p, (b) O1s XPS spectra and (c)SEM-EDS pattern of the Ni-Fe<sub>3</sub>Se<sub>4</sub> catalyst.

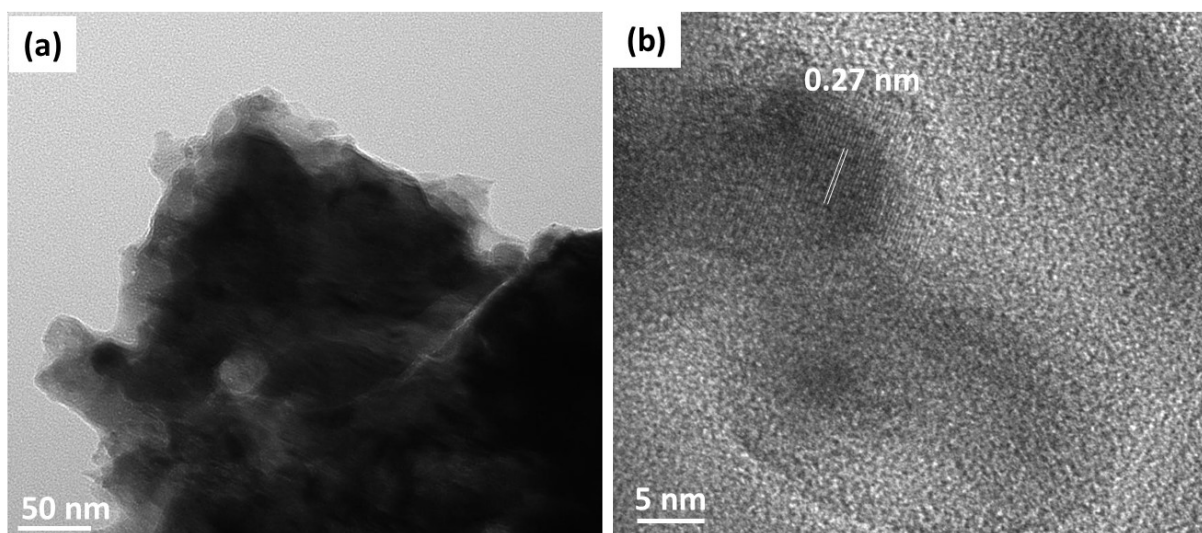

**Figure S4** (a) TEM and (b) HRTEM image of Ni-Fe<sub>3</sub>Se<sub>4</sub> catalyst.

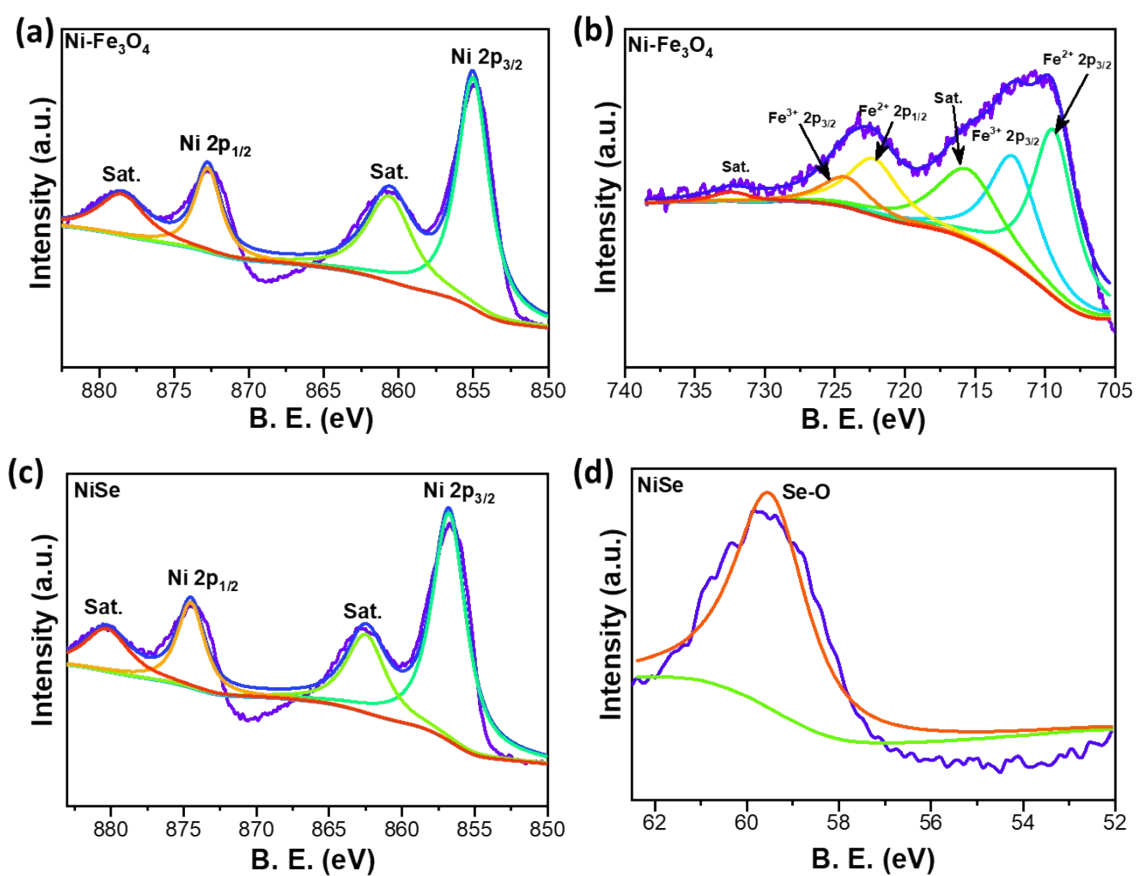

**Figure S5** XPS spectra (a) Ni 2p, (b) Fe 2p of Ni-Fe<sub>3</sub>O<sub>4</sub> and (c) Ni 2p and (d) Se 3d of NiSe.

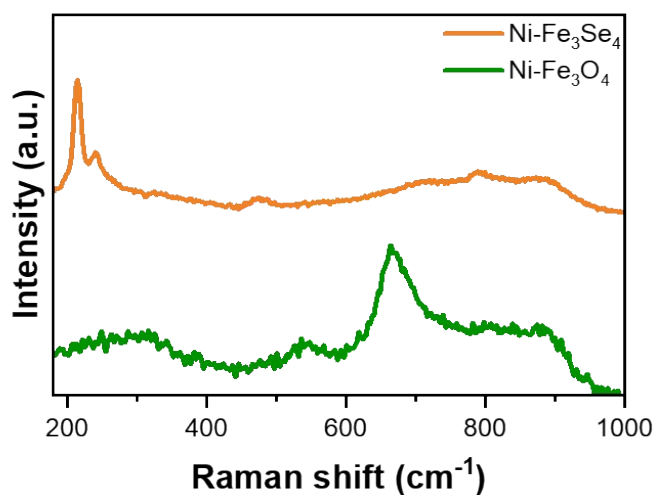

**Figure S6** Raman spectra of Ni-Fe<sub>3</sub>Se<sub>4</sub> and Ni-Fe<sub>3</sub>O<sub>4</sub>.

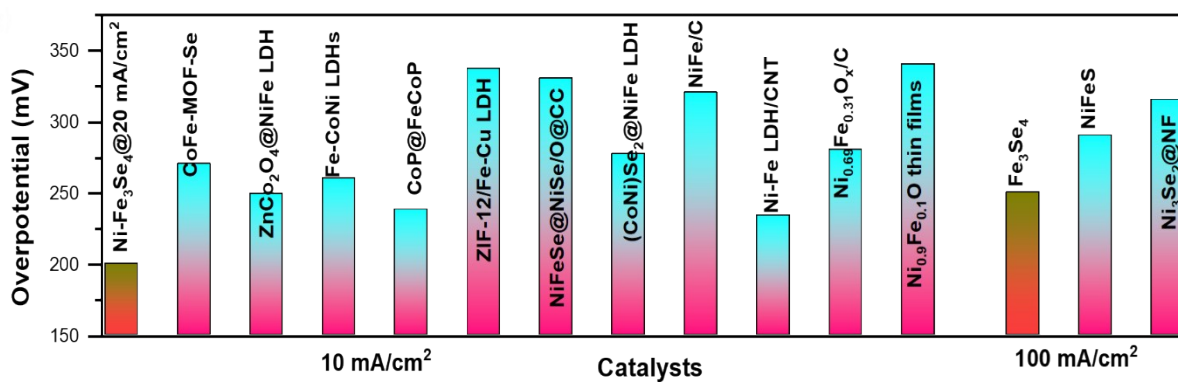

**Figure S7** Comparison of OER performance of Ni-Fe<sub>3</sub>Se<sub>4</sub> with previous reports[1–13].

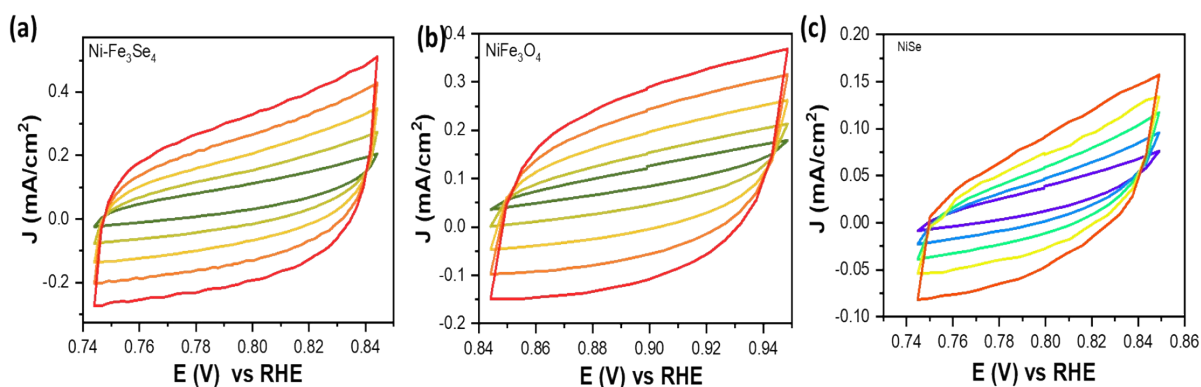

**Figure S8** CV-curves recorded in the non-faradic region at different scan rate 20 to 100 mV/s.



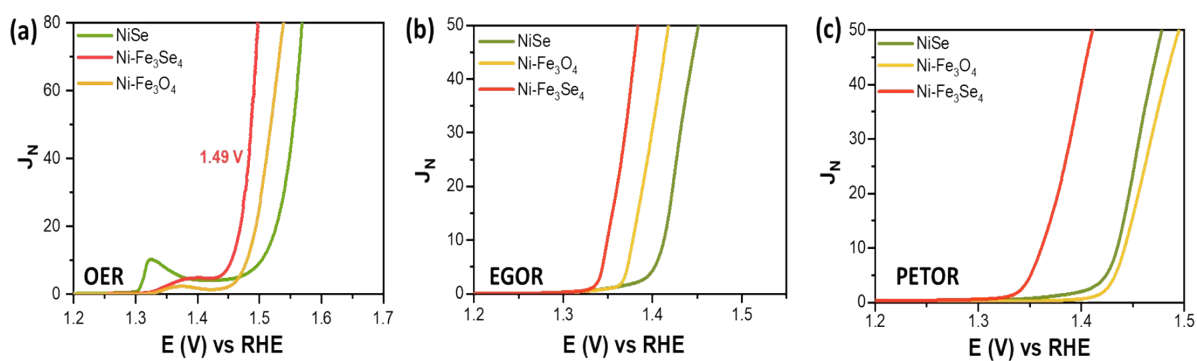

**Figure S9** Normalized polarization curves for OER, EGOR and PETOR.

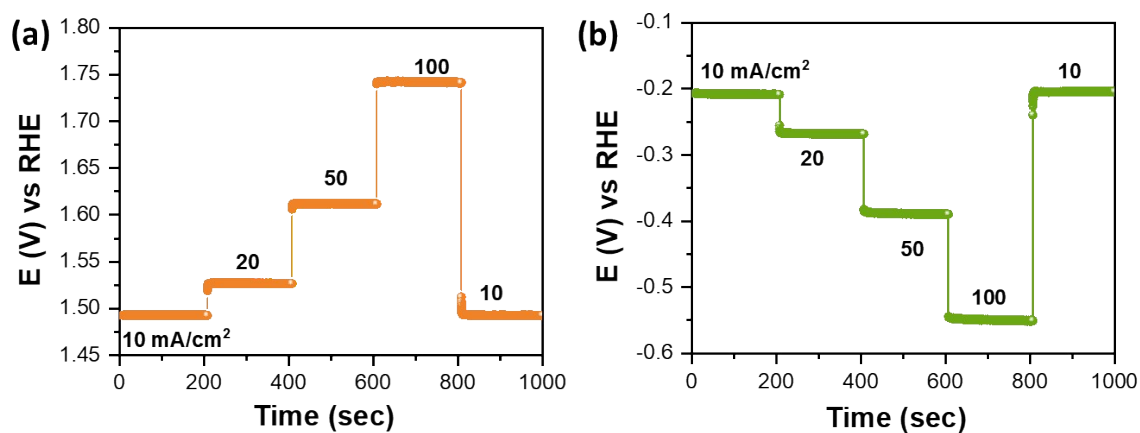

**Figure S10** Multistep chrono-potentiometry curve for (a) HER, (b) OER activity on the Ni-Fe<sub>3</sub>Se<sub>4</sub> catalyst.

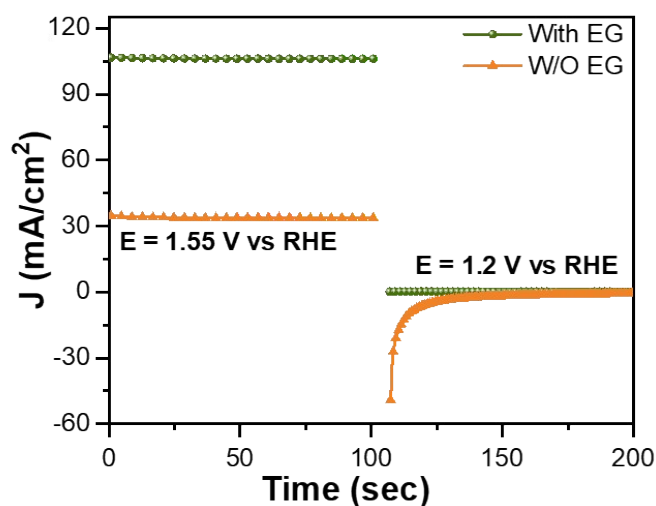

**Figure S11** Chrono-amperometry test to study the indirect oxidation mechanism on Ni-Fe<sub>3</sub>Se<sub>4</sub>.

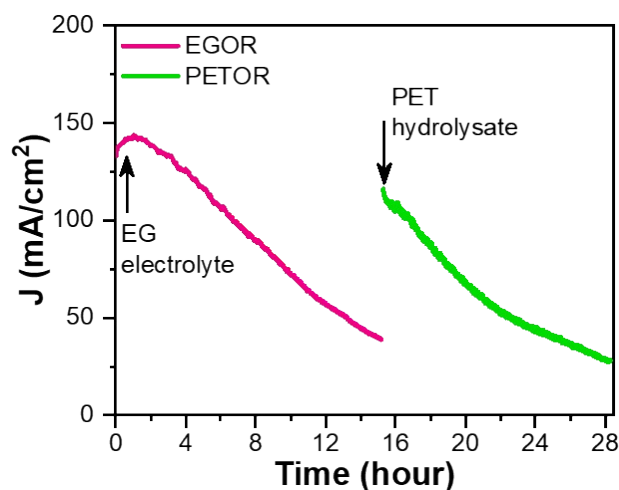

**Figure S12** Chrono-amperometry tests for EGOR and PETOR at 1.6 V vs RHE (without iR compensation).

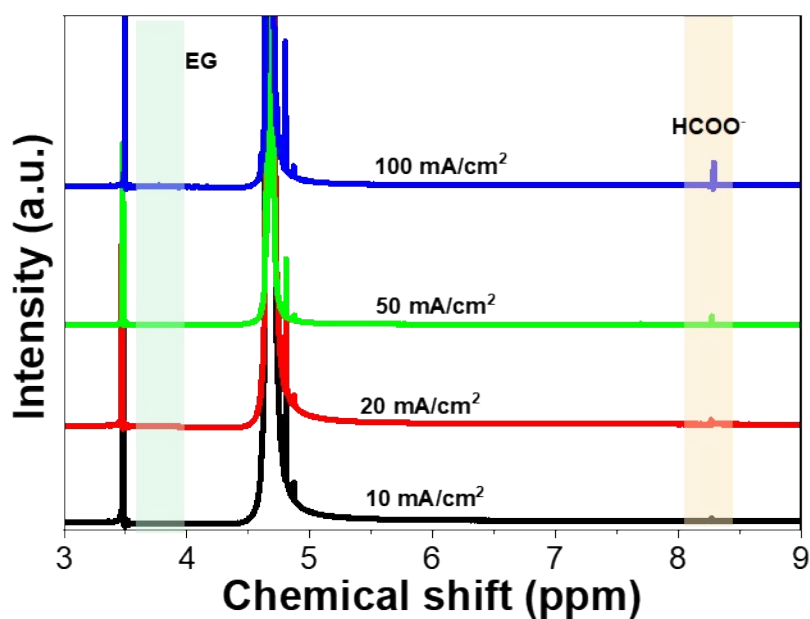

**Figure S13**  $^1\text{H}$  NMR spectra of EG after electrolysis at different current densities for 2 hr.

#### Quantification of Formate and calculation of the faradic efficiency:

For the quantification of the formate in the electrolytes was performed using Shimadzu High-Performance Liquid Chromatographic System, Japan (LC-2010 CHT), equipped with PDA detector fitted with quaternary gradient pump, degasser, column oven and autosampler, Luna  $\text{C}_{18}$  Column (250 mm $\times$ 4.6 mm; 5 $\mu\text{m}$ ). After electrolysis at different current densities (10-100 mA/cm $^2$ ), 1 ml electrolyte was diluted in 9 ml HPLC grade water and used for the recording the chromatograph. The calibration curve was also prepared for the quantification of the formate.

## Optimized Chromatographic Conditions

| Parameters                                                                                                                | Experimental conditions                                                                                                                                                              |
|---------------------------------------------------------------------------------------------------------------------------|--------------------------------------------------------------------------------------------------------------------------------------------------------------------------------------|
| Instrument                                                                                                                | Shimadzu High-Performance Liquid Chromatographic System, Japan (LC-2010 CHT), equipped with PDA detector fitted with quaternary gradient pump, degasser, column oven and autosampler |
| Column                                                                                                                    | Luna C <sub>18</sub> Column (250 mm×4.6 mm; 5μm)                                                                                                                                     |
| Mobile phase                                                                                                              | 27.5 mM H <sub>2</sub> SO <sub>4</sub><br>(0.75 mL of H <sub>2</sub> SO <sub>4</sub> in 500 mL of Milli-Q Water)                                                                     |
| Mobile phase Ratio                                                                                                        | 100 % v/v                                                                                                                                                                            |
| Flow rate                                                                                                                 | 0.3 mL/min                                                                                                                                                                           |
| Diluent                                                                                                                   | Milli-Q Water                                                                                                                                                                        |
| Injection volume                                                                                                          | 20 μL                                                                                                                                                                                |
| Column oven temperature                                                                                                   | 35 °C                                                                                                                                                                                |
| Auto sampler temperature                                                                                                  | 15 °C                                                                                                                                                                                |
| Detector                                                                                                                  | Photo Diode Array (PDA)                                                                                                                                                              |
| Lamp                                                                                                                      | D <sub>2</sub>                                                                                                                                                                       |
| Detection wavelength                                                                                                      | 210 nm                                                                                                                                                                               |
| Software                                                                                                                  | LabSolutions                                                                                                                                                                         |
| Run time                                                                                                                  | 20 minutes                                                                                                                                                                           |
| These were optimized chromatographic conditions which gives satisfactory results and lie well within acceptance criteria. |                                                                                                                                                                                      |

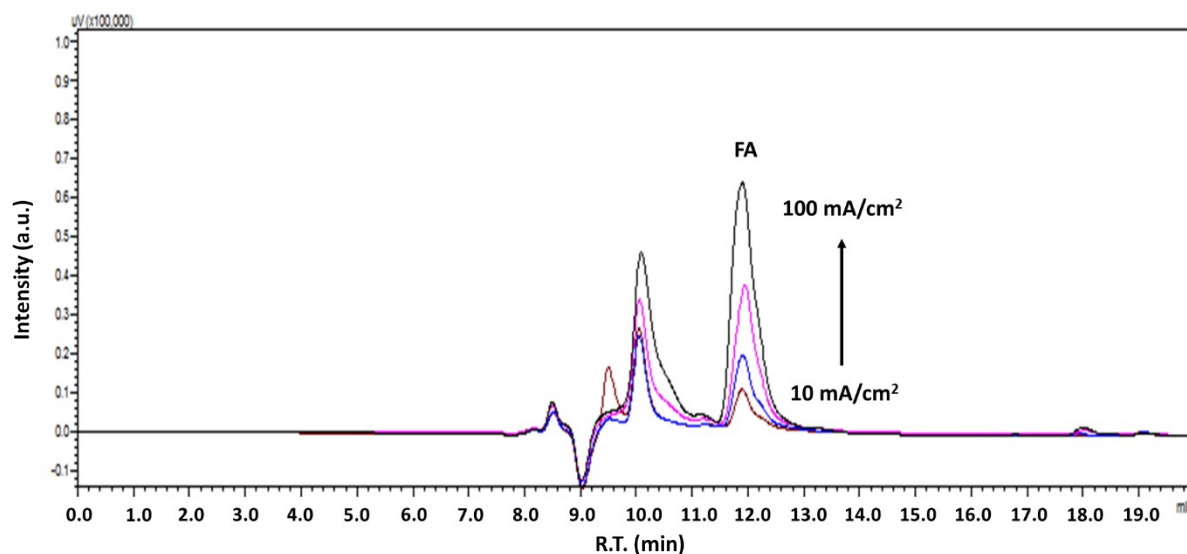

**Figure S14-a** Stack Chromatogram for conversion from EG to formate (FA) electrolyte at different current for 2 hours.



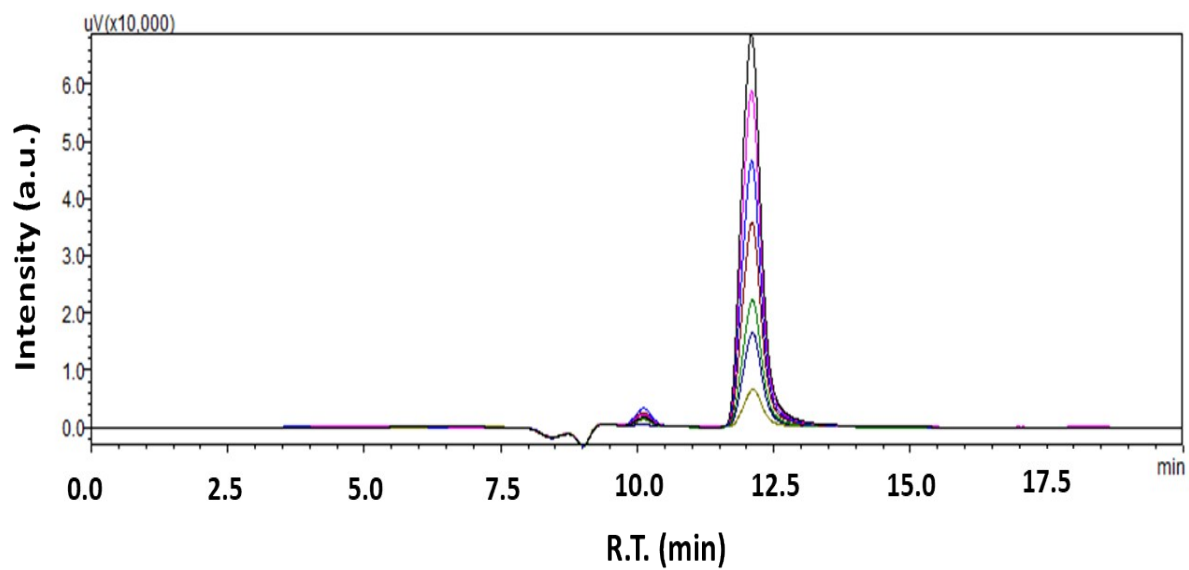

**Figure S14-b** Stack Chromatogram for formic acid standard for calibration curve for quantification.

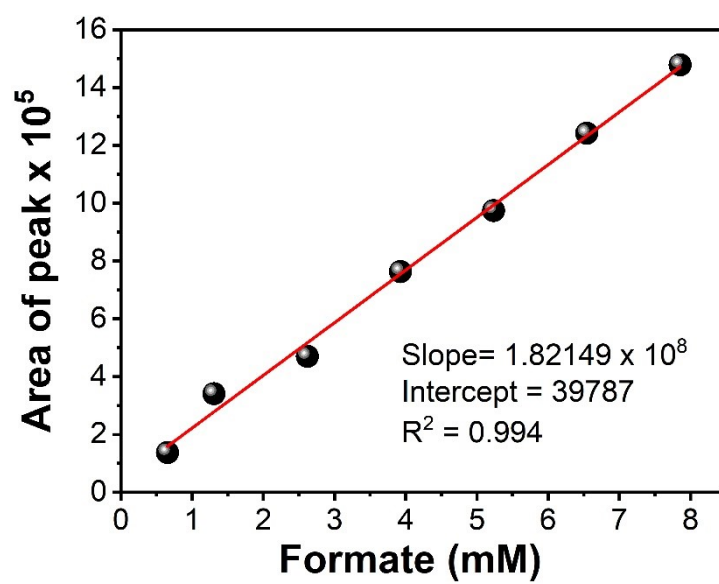

**Figure S14-c** Calibration curve for quantification of the formate.

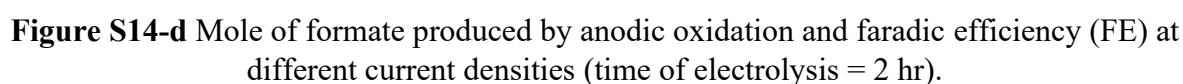
$$FE(\%) = \frac{2 \times \text{mole of HCOOH} \times 96485}{C} \times 100\%$$

The diagram illustrates the chemical pathways for the alkaline degradation of PET. The process begins with the depolymerization of PET (poly(ethylene terephthalate)) using  $\text{KOH} + \text{H}_2\text{O}$  (step 1) to yield potassium terephthalate (TPA-K). TPA-K is then converted to terephthalic acid (TPA) through acidification (step 3). Simultaneously, ethylene glycol (EG) is converted to glycolic acid (GA) (step 2) and then to glyoxal (step 2), both involving the loss of  $2\text{H}_2\text{O}$  and  $2\text{e}^-$  and gain of  $2\text{OH}^-$ . Glyoxal is further converted to formate (step 2) and then to formic acid (FA) (step 3) via acidification. The final products are TPA, FA, and GA.

**Figure S15** PET bottle upcycling process.

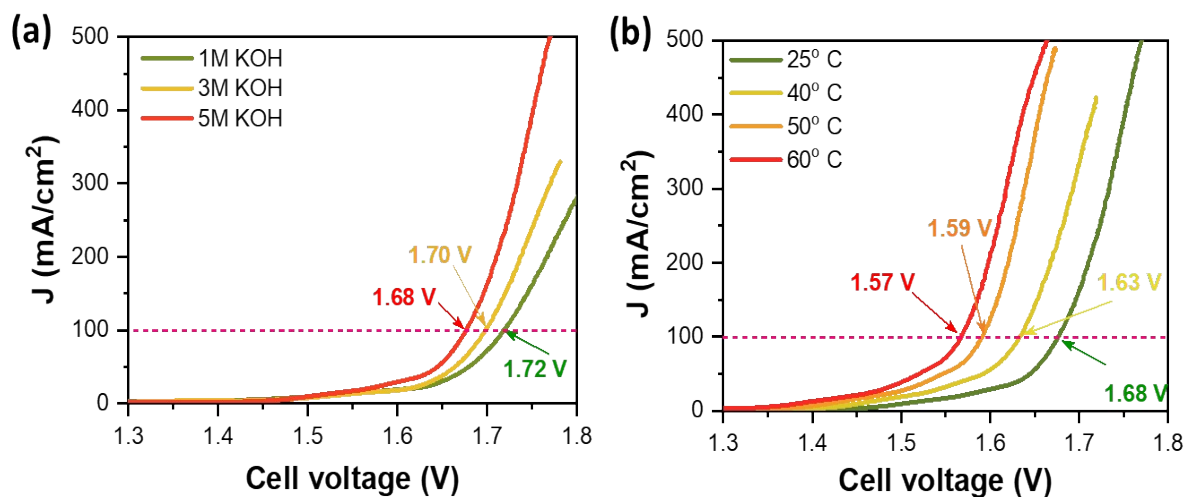

**Figure S16** (a) Polarization curves for bi-functional water electrolysis on Ni-Fe<sub>3</sub>Se<sub>4</sub> electrodes in 1M, 3M and 5M KOH at room temperature, and (b) Polarization curves for bi-functional water electrolysis on Ni-Fe<sub>3</sub>Se<sub>4</sub> electrodes in 5M KOH at elevated temperatures.

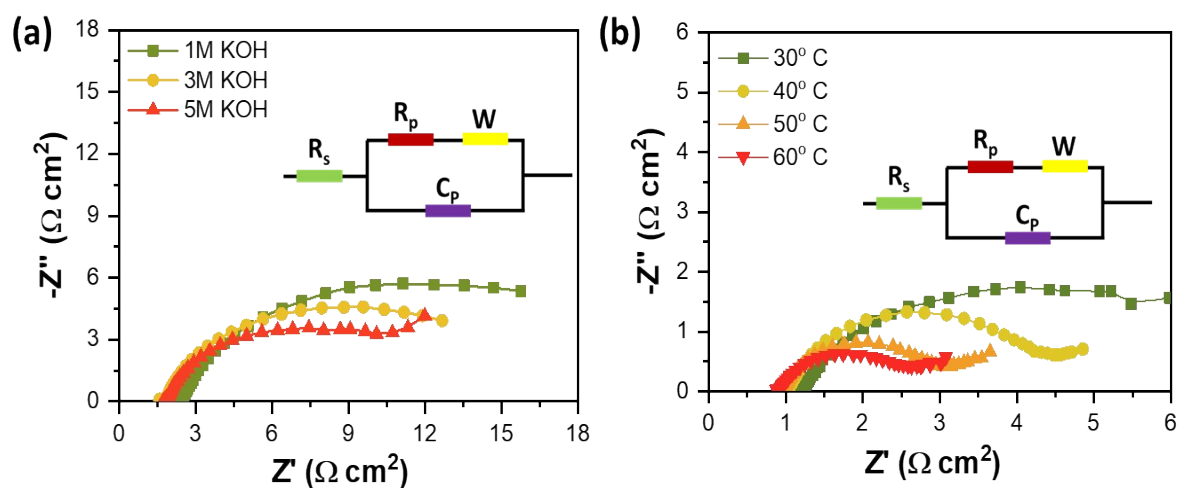

**Figure S17** Nyquist plots for bi-functional water electrolysis recorded at cell voltage 1.5 V.

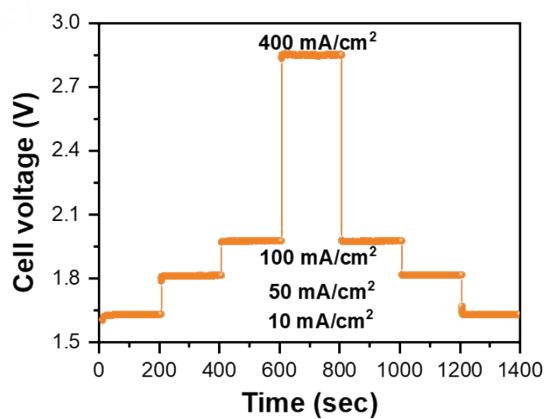

**Figure S18** Multi-step chrono-potentiometry curve for bi-functional water electrolysis on Ni-Fe<sub>3</sub>Se<sub>4</sub> electrode in 1M KOH at room temperature.

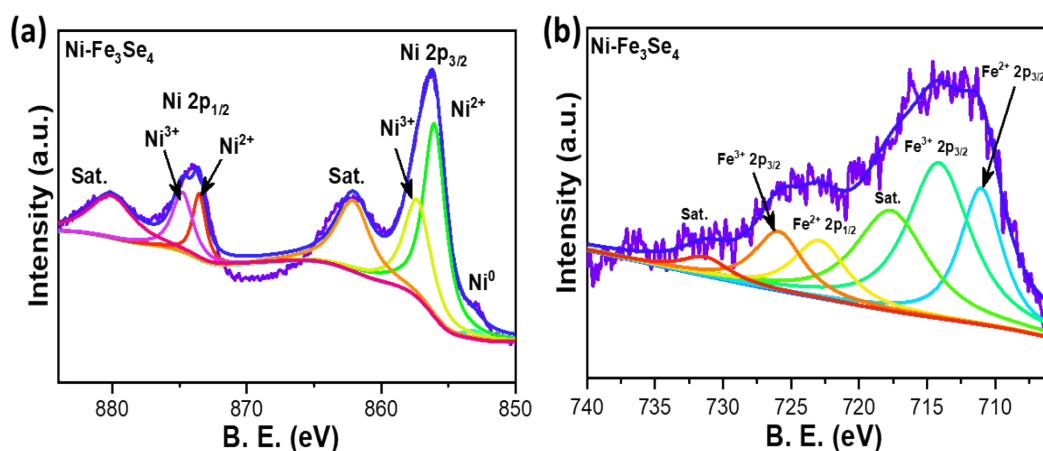

**Figure S19** XPS spectra of Ni-Fe<sub>3</sub>Se<sub>4</sub> after stability test.

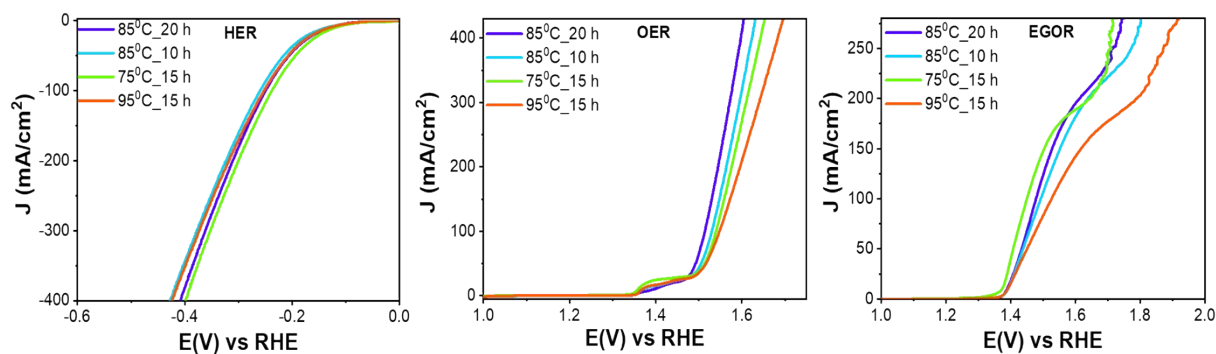

**Figure S20** Polarization curves for HER, OER and EGOR performance of Ni-Fe<sub>3</sub>Se<sub>4</sub> catalysts prepared with different synthesis time duration and temperature.

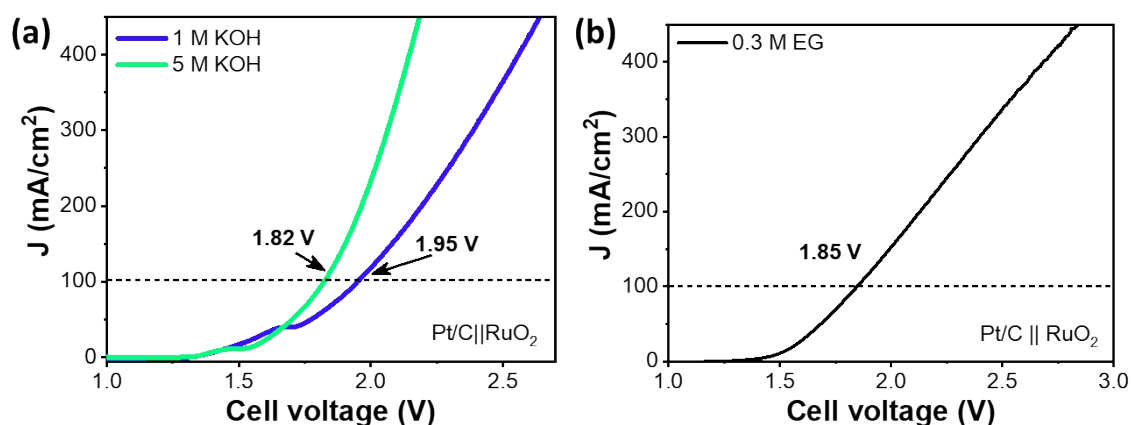

**Figure S21** (a) Polarization curves for water electrolysis in 1M KOH and 5M KOH (b) Polarization curve in 1M KOH + 0.3 M EG of commercial Pt/C-RuO<sub>2</sub> electrolyser

**Table S1** Comparison of OER performance Fe<sub>3</sub>Se<sub>4</sub> with previous reports on transition metal chalcogenides.

| Catalysts                                        | Overpotential (mV)                                        | Tafel slope (mV/dec) | Ref.      |
|--------------------------------------------------|-----------------------------------------------------------|----------------------|-----------|
| Ni-Fe <sub>3</sub> Se <sub>4</sub>               | 164@10 mA/cm <sup>2</sup><br>222 @ 100 mA/cm <sup>2</sup> | 50.9                 | This work |
| CoFe-MOF-Se                                      | 270 @ 10 mA/cm <sup>2</sup>                               | 53.3                 | [12]      |
| NiFeS                                            | 290@ 100 mA/cm <sup>2</sup>                               | 39                   | [3]       |
| ZnCo <sub>2</sub> O <sub>4</sub> @NiFe LDH       | 249@10 mA/cm <sup>2</sup>                                 | 96.7                 | [4]       |
| Fe-CoNi LDHs                                     | 260@10 mA/cm <sup>2</sup>                                 | 49                   | [11]      |
| CoP@FeCoP                                        | 238@10 mA/cm <sup>2</sup>                                 | 47.98                | [5]       |
| ZIF-12/Fe-Cu LDH                                 | 337@10 mA/cm <sup>2</sup>                                 | 89                   | [10]      |
| Ni <sub>3</sub> Se <sub>2</sub> @NF              | 315 @ 100 mA/cm <sup>2</sup>                              | -                    | [1]       |
| NiFeSe@NiSe/O@Carbon cloth                       | 330 @ 10 mA/cm <sup>2</sup>                               | 63.2                 | [2]       |
| (CoNi)Se <sub>2</sub> @NiFe LDH nanocage         | 277 @ 10 mA/cm <sup>2</sup>                               | 75                   | [13]      |
| NiFe/C                                           | 320@ 10 mA/cm <sup>2</sup>                                | 27                   | [6]       |
| Ni-Fe LDH/CNT                                    | 234@ 10 mA/cm <sup>2</sup>                                | 30.7                 | [9]       |
| Ni <sub>0.69</sub> Fe <sub>0.31</sub> Ox/C       | 280@ 10 mA/cm <sup>2</sup>                                | 30                   | [8]       |
| Ni <sub>0.9</sub> Fe <sub>0.1</sub> O thin films | 340@ 10 mA/cm <sup>2</sup>                                | 30                   | [7]       |

**Table S2** Comparison of water electrolysis performance of Ni<sub>x</sub>Fe<sub>3-x</sub>Se<sub>4</sub> with previous reports on transition metal chalcogenides.

| Catalysts                                   | Potential (V)@current density (mA/cm <sup>2</sup> )         | Ref.      |
|---------------------------------------------|-------------------------------------------------------------|-----------|
| Ni-Fe <sub>3</sub> Se <sub>4</sub>          | 1.72@100 in 1M KOH                                          | This work |
| CoMoO//CoMoP NSs@NF                         | ~ 1.9V@100 mA/cm <sup>2</sup>                               | [14]      |
| CoNi/CoFe <sub>2</sub> O <sub>4</sub> /NF   | 1.75V @ 100 mA cm <sup>-2</sup>                             | [15]      |
| Co <sub>0.26</sub> -Ni(OH) <sub>2</sub> /CF | 1.73V@10 mA/cm <sup>2</sup><br>1.9V@100 mA/cm <sup>2</sup>  | [16]      |
| NiCoFeB nanochains                          | 1.81V@10 mA/cm <sup>2</sup><br>1.96V@100 mA/cm <sup>2</sup> | [17]      |
| B, N: Mo <sub>2</sub> C@BCN                 | 1.84V@100 mA/cm <sup>2</sup>                                | [18]      |
| CoMn/CoMn <sub>2</sub> O <sub>4</sub>       | 1.64V@10 mA/cm <sup>2</sup><br>1.91V@100 mA/cm <sup>2</sup> | [19]      |

**Table S3** Comparison of PET/EG electrolysis performance of Ni<sub>x</sub>Fe<sub>3-x</sub>Se<sub>4</sub> with previous reports on transition metal chalcogenides.

| Catalysts                                       | PET treatment and Measurement condition                                                                                                   | Potential (V)@current density (mA/cm <sup>2</sup> )              | Anode FE (%) (Formate)     | Ref.      |
|-------------------------------------------------|-------------------------------------------------------------------------------------------------------------------------------------------|------------------------------------------------------------------|----------------------------|-----------|
| Ni-Fe <sub>3</sub> Se <sub>4</sub>              | 4 g PET Bottle + 50 ml 2M KOH<br>150°C for 15 hr<br>[single cell]                                                                         | 1.49 V @ 10 mA/cm <sup>2</sup><br>1.60 V @ 50 mA/cm <sup>2</sup> | 89% @50 mA/cm <sup>2</sup> | This work |
| OMS-Ni <sub>1</sub> -CoP                        | 6.3 g PET + 100 ml 2M KOH<br>[Single cell]                                                                                                | 1.52 V @ 10 mA/cm <sup>2</sup>                                   | 96%                        | [20]      |
| CuCo <sub>2</sub> O <sub>4</sub> /NF            | 5g PET + 50 ml 5M KOH<br>[Membrane electrode assembly (MEA) flow cell]                                                                    | 1.56 V @ 100 mA/cm <sup>2</sup>                                  | 93%                        | [21]      |
| Ni <sub>3</sub> N/W <sub>5</sub> N <sub>4</sub> | 2.0 g PET bottle + 100 ml 4M KOH<br>[AEM H-type cell]                                                                                     | 1.47 V @ 50 mA/cm <sup>2</sup>                                   | 85%                        | [22]      |
| NiCo <sub>2</sub> O <sub>4</sub> /CFP           | 0.768 g PET powder was added in 40 mL of 1 M NaOH solution and autoclaved at 180°C for 2 h. [ H-type cell (anion exchange membrane, AEM)] | 1.9 V @ 20 mA/cm <sup>2</sup><br><br>Cathode:CO <sub>2</sub> RR  | 90%                        | [23]      |
| CuO nanowire                                    | 0.77 g PET powder was added in 40 mL of 1 M KOH solution and autoclaved at 180°C for 2h                                                   | -<br>[H-type cell]                                               | 88%                        | [24]      |

**Table S4** Optimization of parameters for PET hydrolysis.

|    |                        |                         |        |                          |
|----|------------------------|-------------------------|--------|--------------------------|
| 1. | 4 g PET (waste bottle) | 2M KOH<br>(50 ml water) | 160° C | 15 h (~100% degradation) |
| 2. | 4 g PET (waste bottle) | 2M KOH<br>(50 ml water) | 160° C | 6 h (~20% degradation)   |
| 3. | 4 g PET (waste bottle) | 2M KOH<br>(50 ml water) | 160° C | 10 h (~80% degradation)  |
| 4. | 6 g PET (waste bottle) | 2M KOH<br>(60 ml water) | 160° C | 15 h (~100% degradation) |
| 5. | 4 g PET (waste bottle) | 2M KOH<br>(50 ml water) | 120° C | 15 h (~80% degradation)  |

#### Reference:

- [1] A. Sivanantham, S. Shanmugam, Nickel selenide supported on nickel foam as an efficient and durable non-precious electrocatalyst for the alkaline water electrolysis,



- Appl. Catal. B Environ. 203 (2017) 485–493.  
<https://doi.org/https://doi.org/10.1016/j.apcatb.2016.10.050>.
- [2] G. Yilmaz, C.F. Tan, Y.-F. Lim, G.W. Ho, Pseudomorphic Transformation of Interpenetrated Prussian Blue Analogs into Defective Nickel Iron Selenides for Enhanced Electrochemical and Photo-Electrochemical Water Splitting, *Adv. Energy Mater.* 9 (2019) 1802983. <https://doi.org/https://doi.org/10.1002/aenm.201802983>.
  - [3] J. Wang, J.M. Barforoush, K.C. Leonard, Sulfur incorporation into NiFe oxygen evolution electrocatalysts for improved high current density operation, *Mater. Adv.* 4 (2023) 122–133. <https://doi.org/10.1039/D2MA00902A>.
  - [4] R. Que, S. Liu, Y. Yang, Y. Pan, High catalytic performance of core-shell structure ZnCo<sub>2</sub>O<sub>4</sub>@NiFe LDH for oxygen evolution reaction, *Mater. Lett.* 298 (2021) 129982. <https://doi.org/https://doi.org/10.1016/j.matlet.2021.129982>.
  - [5] J. Shi, F. Qiu, W. Yuan, M. Guo, Z.-H. Lu, Nitrogen-doped carbon-decorated yolk-shell CoP@FeCoP micro-polyhedra derived from MOF for efficient overall water splitting, *Chem. Eng. J.* 403 (2021) 126312. <https://doi.org/https://doi.org/10.1016/j.cej.2020.126312>.
  - [6] A. Sakamaki, M. Yoshida-Hirahara, H. Ogihara, H. Kurokawa, One-Step Synthesis of Highly Active NiFe Electrocatalysts for the Oxygen Evolution Reaction, *Langmuir*. 38 (2022) 5525–5531. <https://doi.org/10.1021/acs.langmuir.2c00097>.
  - [7] L. Trotochaud, J.K. Ranney, K.N. Williams, S.W. Boettcher, Solution-Cast Metal Oxide Thin Film Electrocatalysts for Oxygen Evolution, *J. Am. Chem. Soc.* 134 (2012) 17253–17261. <https://doi.org/10.1021/ja307507a>.
  - [8] Y. Qiu, L. Xin, W. Li, Electrocatalytic Oxygen Evolution over Supported Small Amorphous Ni–Fe Nanoparticles in Alkaline Electrolyte, *Langmuir*. 30 (2014) 7893–7901. <https://doi.org/10.1021/la501246e>.
  - [9] M. Duan, M. Qiu, S. Sun, X. Guo, Y. Liu, X. Zheng, F. Cao, Q. Kong, J. Zhang, Intercalating assembly of NiFe LDH nanosheets/CNTs composite as high-performance electrocatalyst for oxygen evolution reaction, *Appl. Clay Sci.* 216 (2022) 106360. <https://doi.org/https://doi.org/10.1016/j.clay.2021.106360>.
  - [10] A. Hameed, M. Batool, W. Iqbal, S. Abbas, M. Imran, I.A. Khan, M.A. Nadeem, ZIF-12/Fe-Cu LDH Composite as a High Performance Electrocatalyst for Water Oxidation, *Front. Chem.* 9 (2021). <https://doi.org/10.3389/fchem.2021.686968>.
  - [11] Y. Shi, J. Li, B. Zhang, S. Lv, T. Wang, X. Liu, Tuning electronic structure of CoNi LDHs via surface Fe doping for achieving effective oxygen evolution reaction, *Appl. Surf. Sci.* 565 (2021). <https://doi.org/10.1016/j.apsusc.2021.150506>.
  - [12] Z. Shang, T. Li, B. Hu, M. Liu, W. Lu, F. Yu, Y. Zheng, Two-dimensional bimetallic selenium-containing metal-organic frameworks and their calcinated derivatives as electrocatalysts for overall water splitting, *Front. Energy.* (2024). <https://doi.org/10.1007/s11708-024-0924-x>.
  - [13] J.-G. Li, H. Sun, L. Lv, Z. Li, X. Ao, C. Xu, Y. Li, C. Wang, Metal–Organic Framework-Derived Hierarchical (Co,Ni)Se<sub>2</sub>@NiFe LDH Hollow Nanocages for Enhanced Oxygen Evolution, *ACS Appl. Mater. Interfaces*. 11 (2019) 8106–8114. <https://doi.org/10.1021/acsami.8b22133>.

- [14] Y. Zhang, Q. Shao, S. Long, X. Huang, Cobalt-molybdenum nanosheet arrays as highly efficient and stable earth-abundant electrocatalysts for overall water splitting, *Nano Energy*. 45 (2018) 448–455.
- [15] S. Li, S. Sirisomboonchai, A. Yoshida, X. An, X. Hao, A. Abudula, G. Guan, Bifunctional CoNi/CoFe<sub>2</sub>O<sub>4</sub>/Ni foam electrodes for efficient overall water splitting at a high current density, *J. Mater. Chem. A*. 6 (2018) 19221–19230.
- [16] C.B. Sun, M.W. Guo, S.S. Siwal, Q.B. Zhang, Efficient hydrogen production via urea electrolysis with cobalt doped nickel hydroxide-riched hybrid films: Cobalt doping effect and mechanism aspect, *J. Catal.* 381 (2020) 454–461.  
<https://doi.org/https://doi.org/10.1016/j.jcat.2019.11.034>.
- [17] Y. Li, B. Huang, Y. Sun, M. Luo, Y. Yang, Y. Qin, L. Wang, C. Li, F. Lv, W. Zhang, Multimetal borides nanochains as efficient electrocatalysts for overall water splitting, *Small*. 15 (2019) 1804212.
- [18] M.A.R. Anjum, M.H. Lee, J.S. Lee, Boron-and nitrogen-codoped molybdenum carbide nanoparticles imbedded in a BCN network as a bifunctional electrocatalyst for hydrogen and oxygen evolution reactions, *ACS Catal.* 8 (2018) 8296–8305.
- [19] D. Zheng, Z. Jing, Q. Zhao, Y. Kim, P. Li, H. Xu, Z. Li, J. Lin, Efficient Co-doped pyrrhotite Fe<sub>0.95</sub>S<sub>1.05</sub> nanoplates for electrochemical water splitting, *Chem. Eng. J.* 402 (2020) 125069.
- [20] N. Wang, X. Li, M.-K. Hu, W. Wei, S.-H. Zhou, X.-T. Wu, Q.-L. Zhu, Ordered macroporous superstructure of bifunctional cobalt phosphide with heteroatomic modification for paired hydrogen production and polyethylene terephthalate plastic recycling, *Appl. Catal. B Environ.* 316 (2022) 121667.  
<https://doi.org/https://doi.org/10.1016/j.apcatb.2022.121667>.
- [21] F. Liu, X. Gao, R. Shi, E.C.M. Tse, Y. Chen, A general electrochemical strategy for upcycling polyester plastics into added-value chemicals by a CuCo<sub>2</sub>O<sub>4</sub> catalyst, *Green Chem.* 24 (2022) 6571–6577. <https://doi.org/10.1039/D2GC02049A>.
- [22] F. Ma, S. Wang, X. Gong, X. Liu, Z. Wang, P. Wang, Y. Liu, H. Cheng, Y. Dai, Z. Zheng, B. Huang, Highly efficient electrocatalytic hydrogen evolution coupled with upcycling of microplastics in seawater enabled via Ni<sub>3</sub>N/W<sub>5</sub>N<sub>4</sub> janus nanostructures, *Appl. Catal. B Environ. Energy*. 307 (2022) 121198.  
<https://doi.org/https://doi.org/10.1016/j.apcatb.2022.121198>.
- [23] J. Wang, X. Li, M. Wang, T. Zhang, X. Chai, J. Lu, T. Wang, Y. Zhao, D. Ma, Electrocatalytic Valorization of Poly(ethylene terephthalate) Plastic and CO<sub>2</sub> for Simultaneous Production of Formic Acid, *ACS Catal.* 12 (2022) 6722–6728.  
<https://doi.org/10.1021/acscatal.2c01128>.
- [24] J. Wang, X. Li, T. Zhang, Y. Chen, T. Wang, Y. Zhao, Electro-reforming polyethylene terephthalate plastic to co-produce valued chemicals and green hydrogen, *J. Phys. Chem. Lett.* 13 (2022) 622–627.
